# Supplementary material
Source: Springer Nature journal article supplement (https://www.springermedizin.de/resource/supplementary/12889_2012_5185_MOESM1_ESM.pdf/9494796)

Demography and sources

(Age, gender, education, income, occupation, etc.)

Prior knowledge

Health literacy

Health behavior

Health status

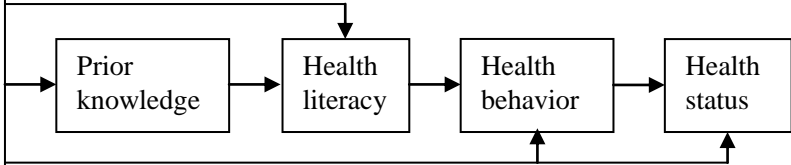

Supplement: MOESM1 [file 9494796]
